# Supplementary material for: Enantioenriched Positive Allosteric Modulators Display Distinct Pharmacology at the Dopamine D1 Receptor
Source: MDPI journal article supplement (doi:10.3390/molecules26133799), 2021-06-22

## Supplementary Material

### Table of Contents

|                       |                                                                                                                                      |
|-----------------------|--------------------------------------------------------------------------------------------------------------------------------------|
| <b>Figure S1</b>      | <b>Chiral HPLC chromatogram for Compound 5.....S2</b>                                                                                |
| <b>Figure S2</b>      | <b>Chiral HPLC chromatogram for Compound (S)-21.....S2</b>                                                                           |
| <b>Figure S3</b>      | <b>Chiral HPLC chromatogram for Compound (R)-21.....S3</b>                                                                           |
| <b>Figures S4-S7</b>  | <b>HPLC &amp; chiral HPLC chromatograms, <math>^1\text{H}</math> &amp; <math>^{13}\text{C}</math> NMR spectra for 2.....S3-5</b>     |
| <b>Figure S8</b>      | <b>HPLC chromatogram (MeOH blank).....S5</b>                                                                                         |
| <b>Figure S9-S12</b>  | <b>HPLC &amp; chiral HPLC chromatograms, <math>^1\text{H}</math> &amp; <math>^{13}\text{C}</math> NMR spectra for (S)-2.....S6-7</b> |
| <b>Figure S13-S16</b> | <b>HPLC &amp; chiral HPLC chromatograms, <math>^1\text{H}</math> &amp; <math>^{13}\text{C}</math> NMR spectra for (R)-2.....S8-9</b> |

**Figure S1. Chiral HPLC trace for Compound 5 (racemic carboxylic acid), obtained using ‘Column A’ as outlined in general information.**

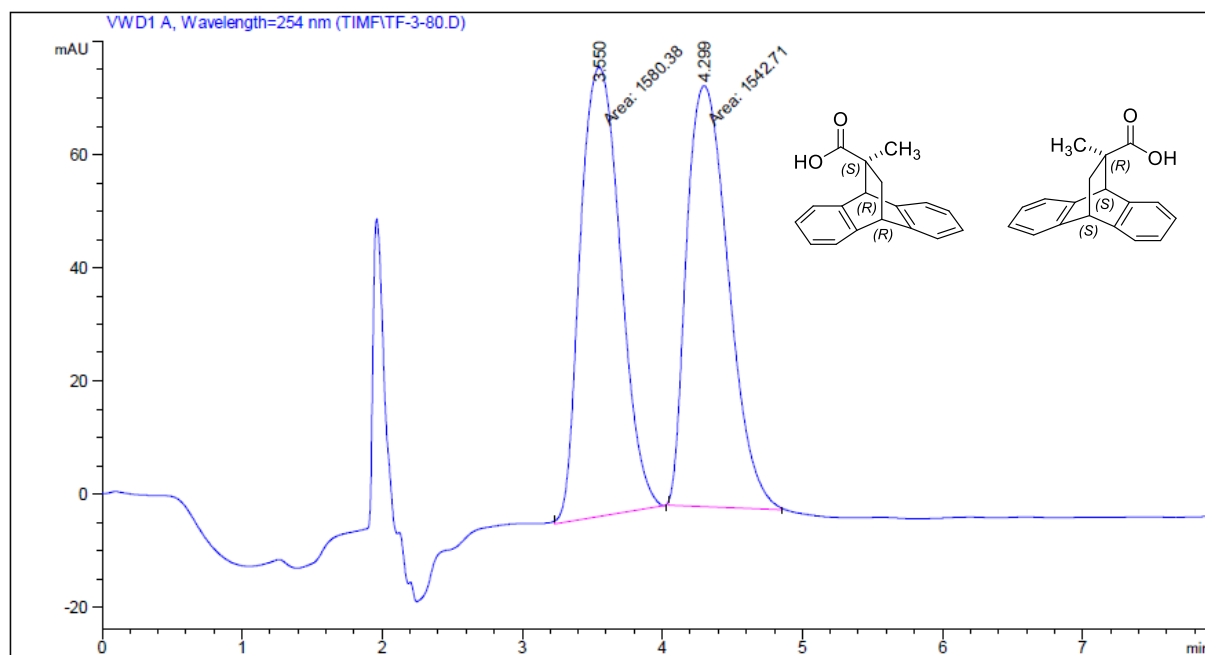

**Figure S2. Chiral HPLC trace for Compound (S)-21 (carboxylic acid), obtained using ‘Column A’ as outlined in general information.**

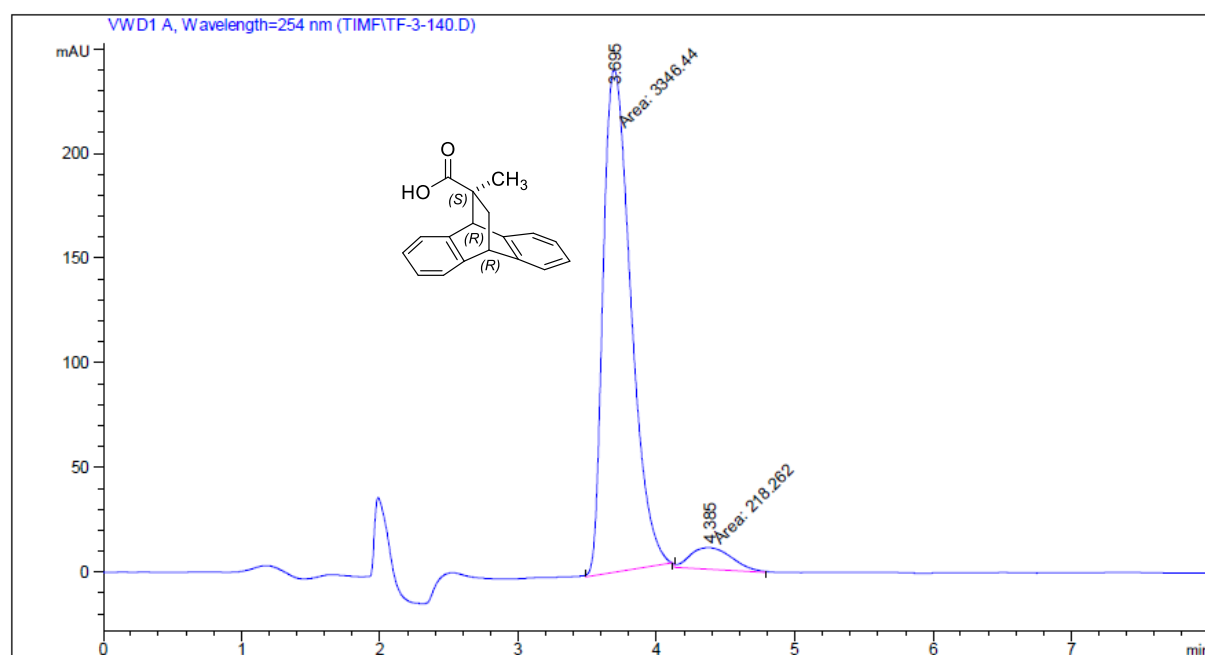

**Figure S3. Chiral HPLC trace for Compound (*R*)-21 (carboxylic acid), obtained using 'Column A' as outlined in general information.**

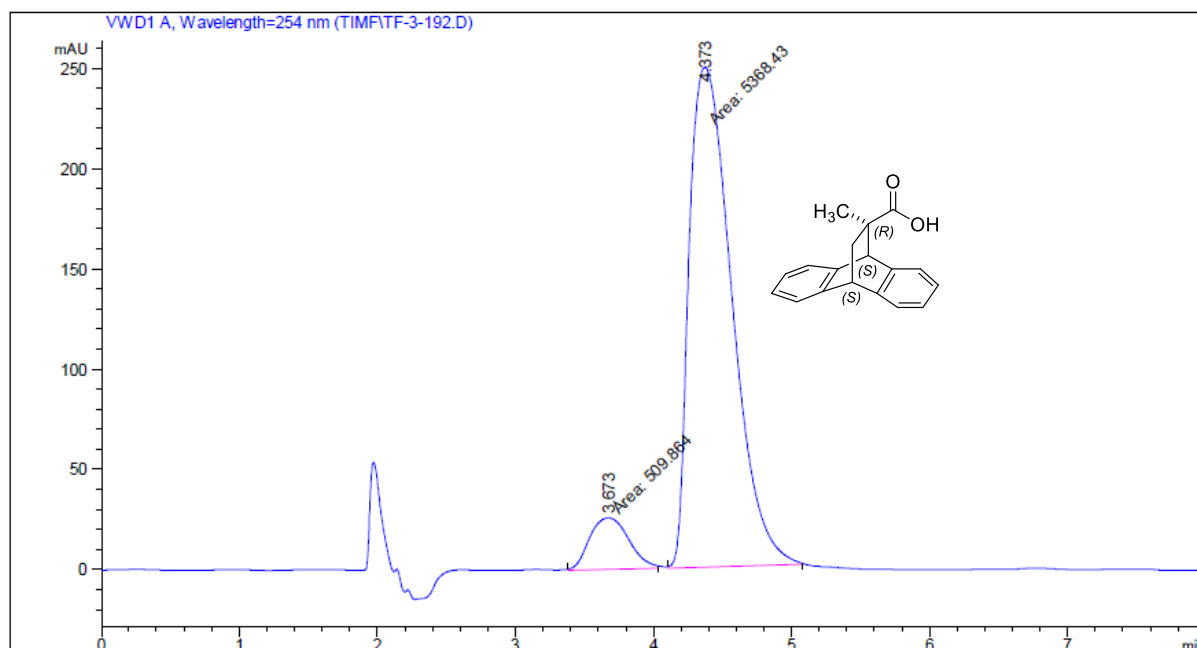

**Figure S4. Analytical HPLC trace for Compound (*rac*-2).**

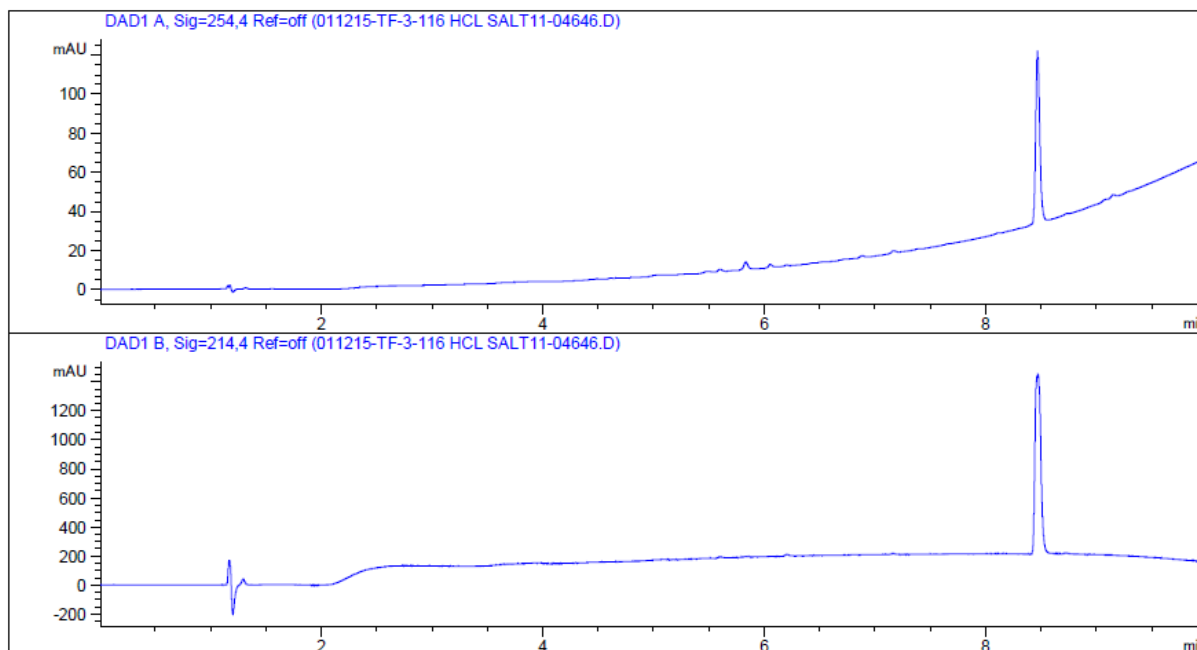

**Figure S5. Chiral HPLC trace for Compound (*rac*-2), obtained using ‘Column B’ as outlined in general information.**

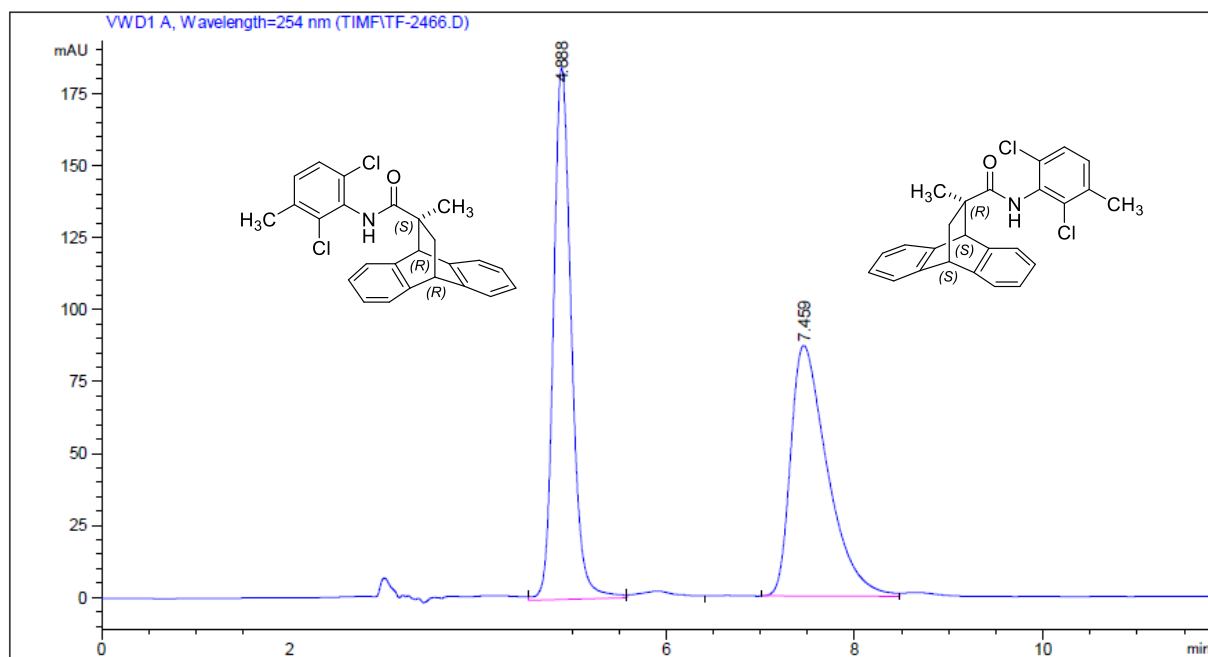

**Figure S6.  $^1\text{H}$  NMR spectrum for Compound (*rac*-2).**

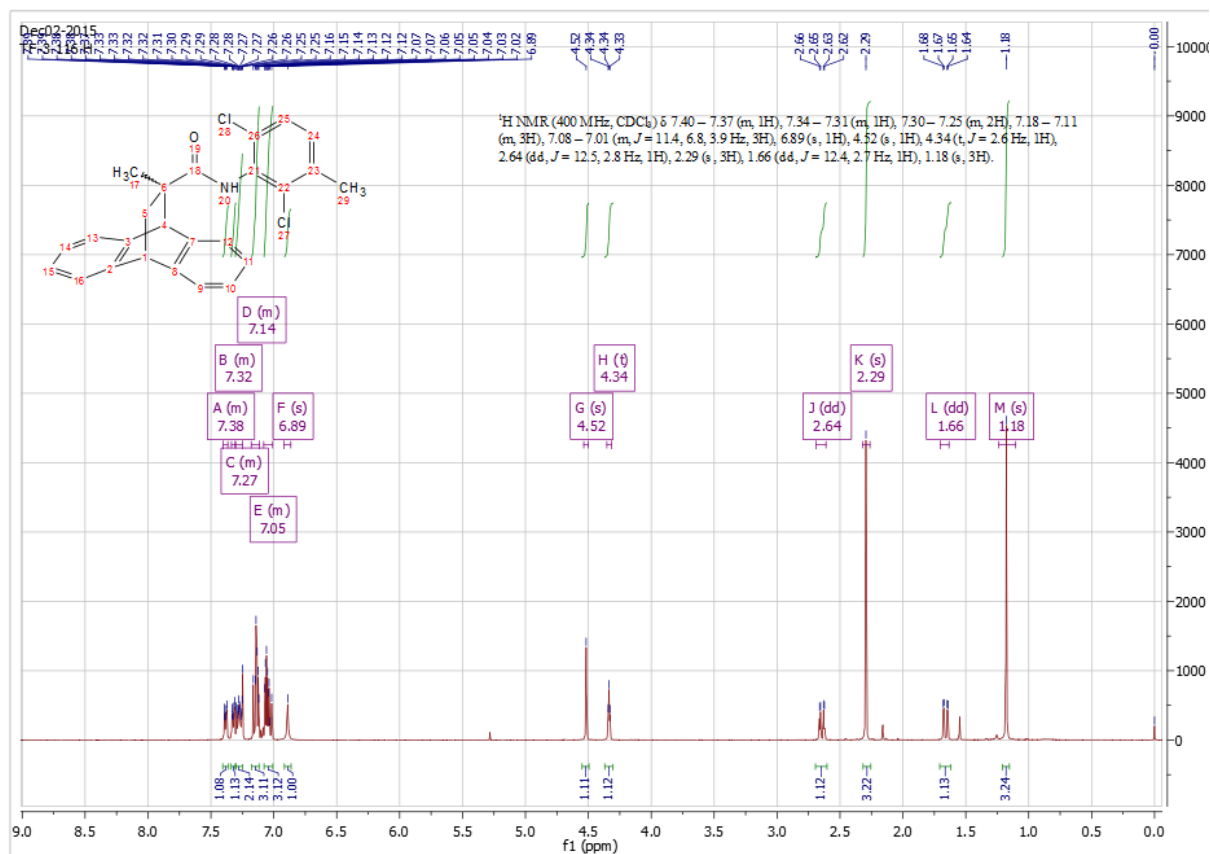

**Figure S7.  $^{13}\text{C}$  NMR spectrum for Compound (*rel*-2).**

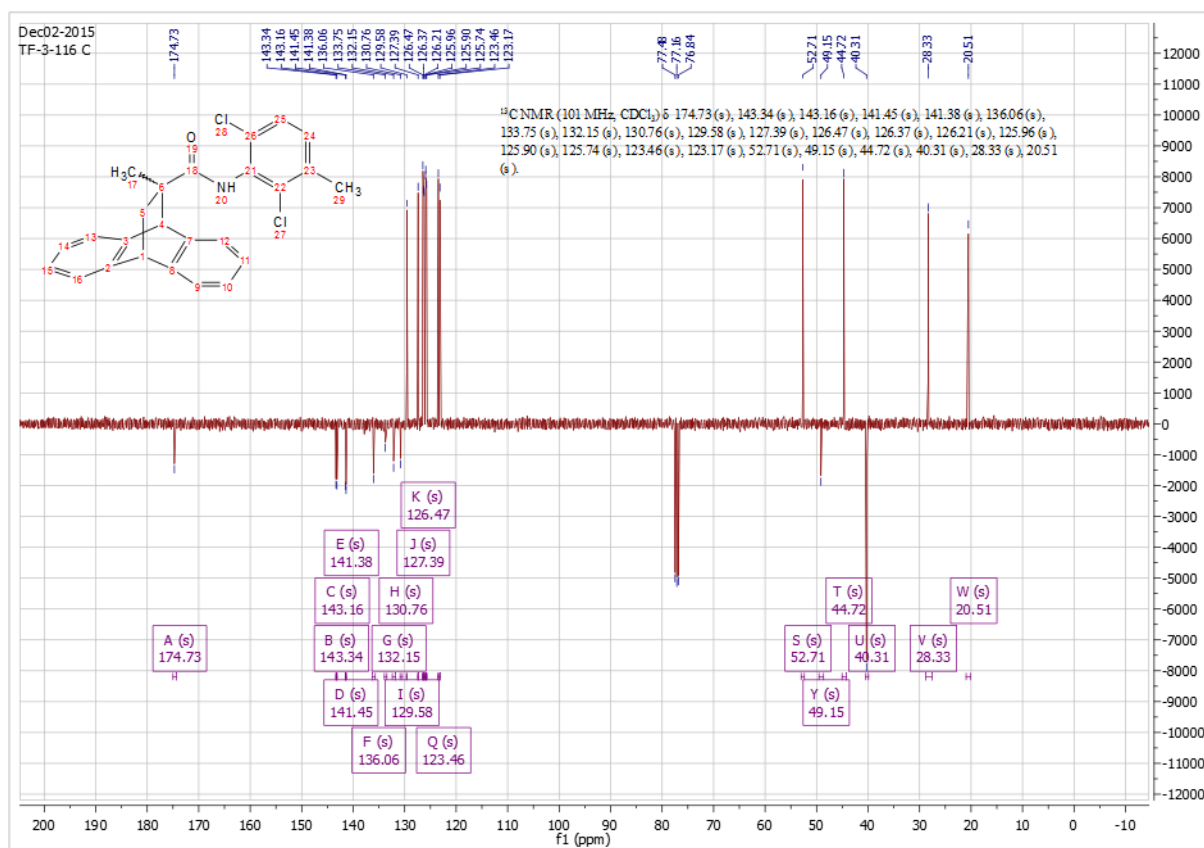

**Figure S8 Analytical HPLC trace (MeOH BLANK).**

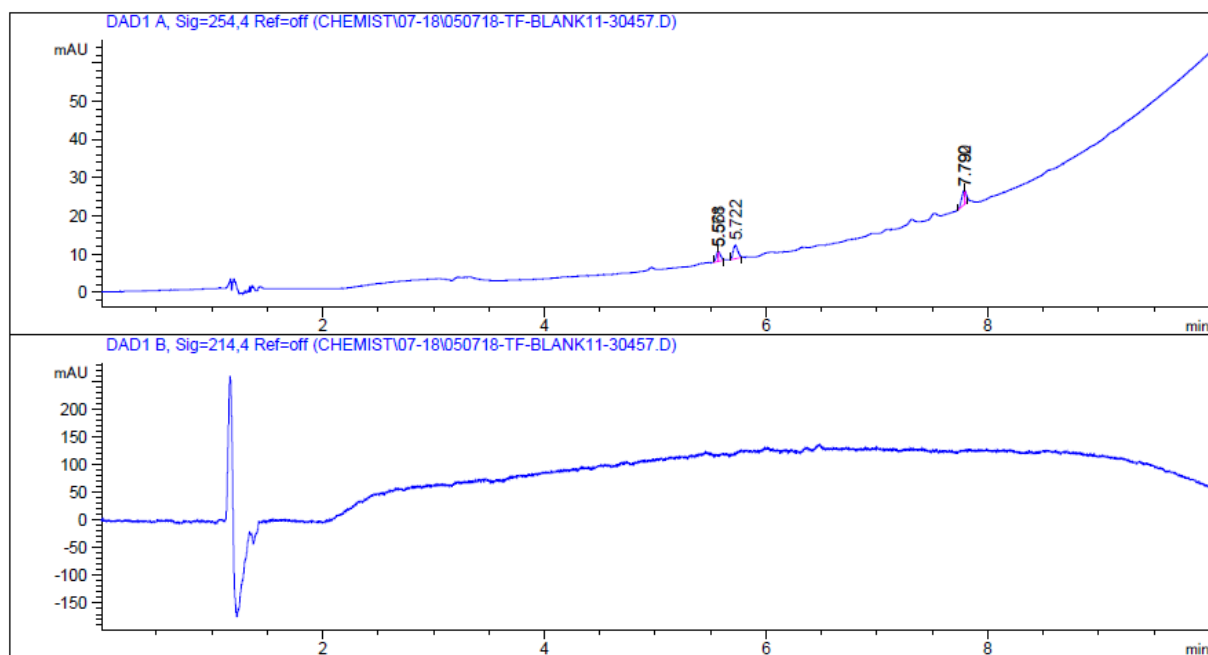

**Figure S9. Analytical HPLC Trace for Compound (S)-2.**

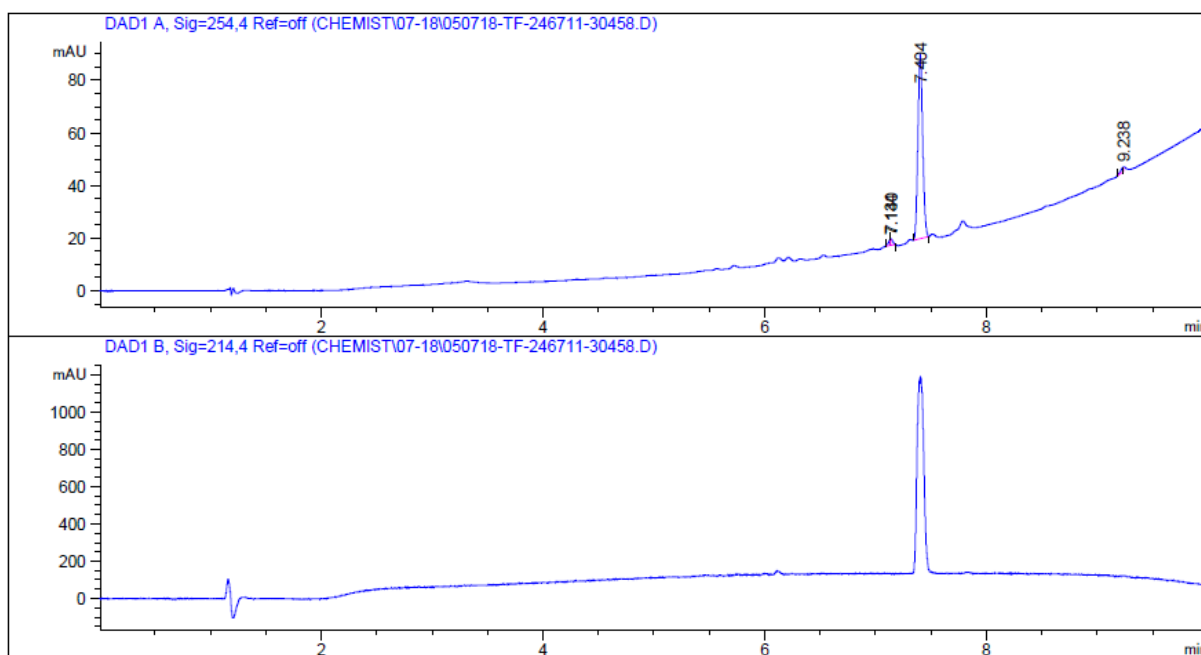

**Figure S10. Chiral HPLC Trace for Compound (S)-2, obtained using 'Column B' as outlined in general information.**

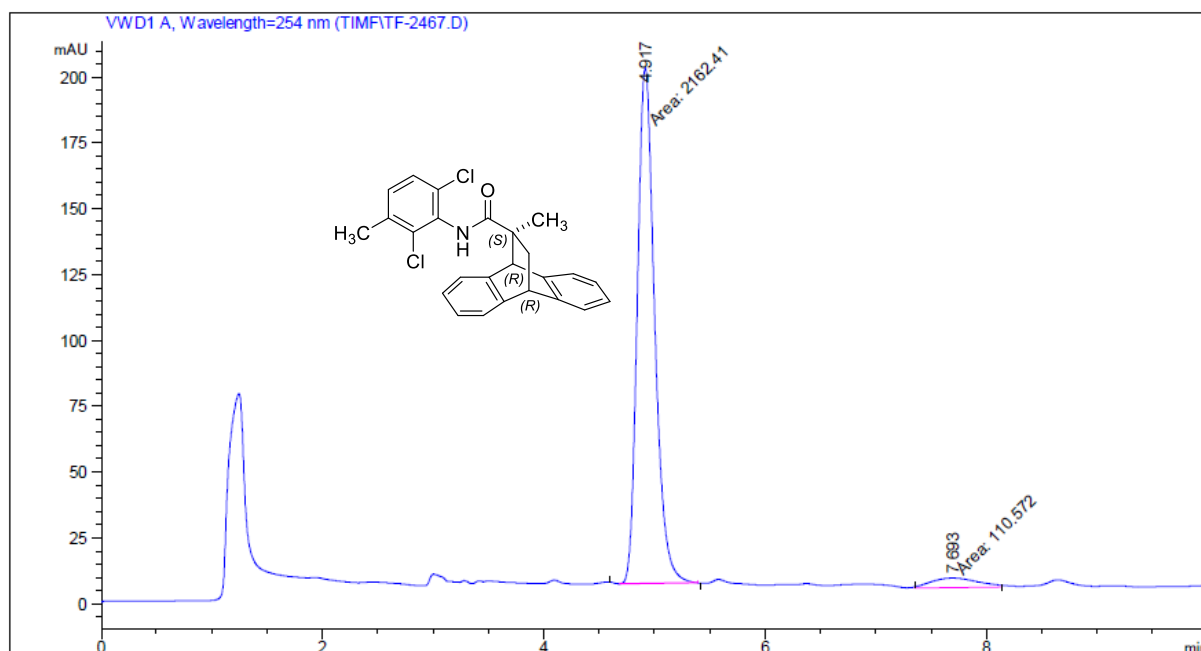

Figure S11.  $^1\text{H}$  NMR spectrum for Compound (S)-2.

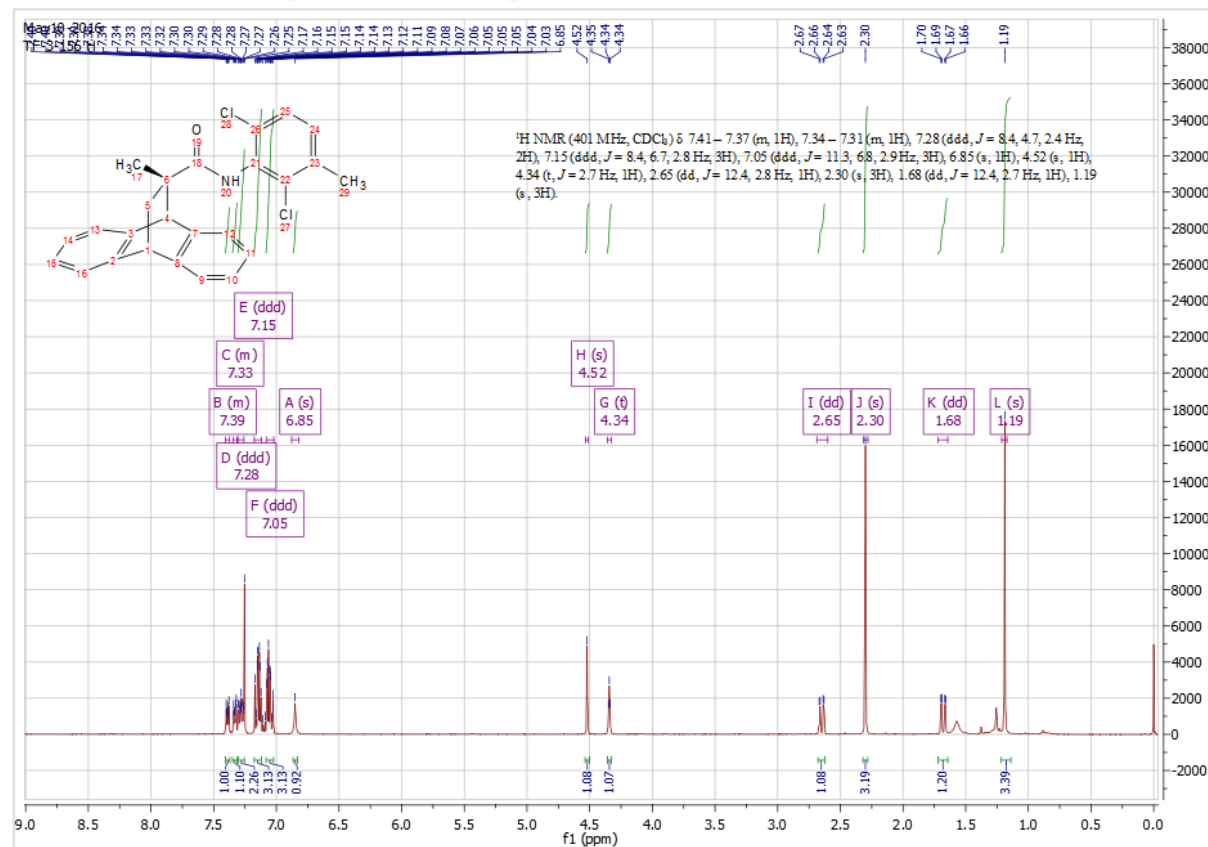

Figure S12.  $^{13}\text{C}$  NMR spectrum for Compound (S)-2.

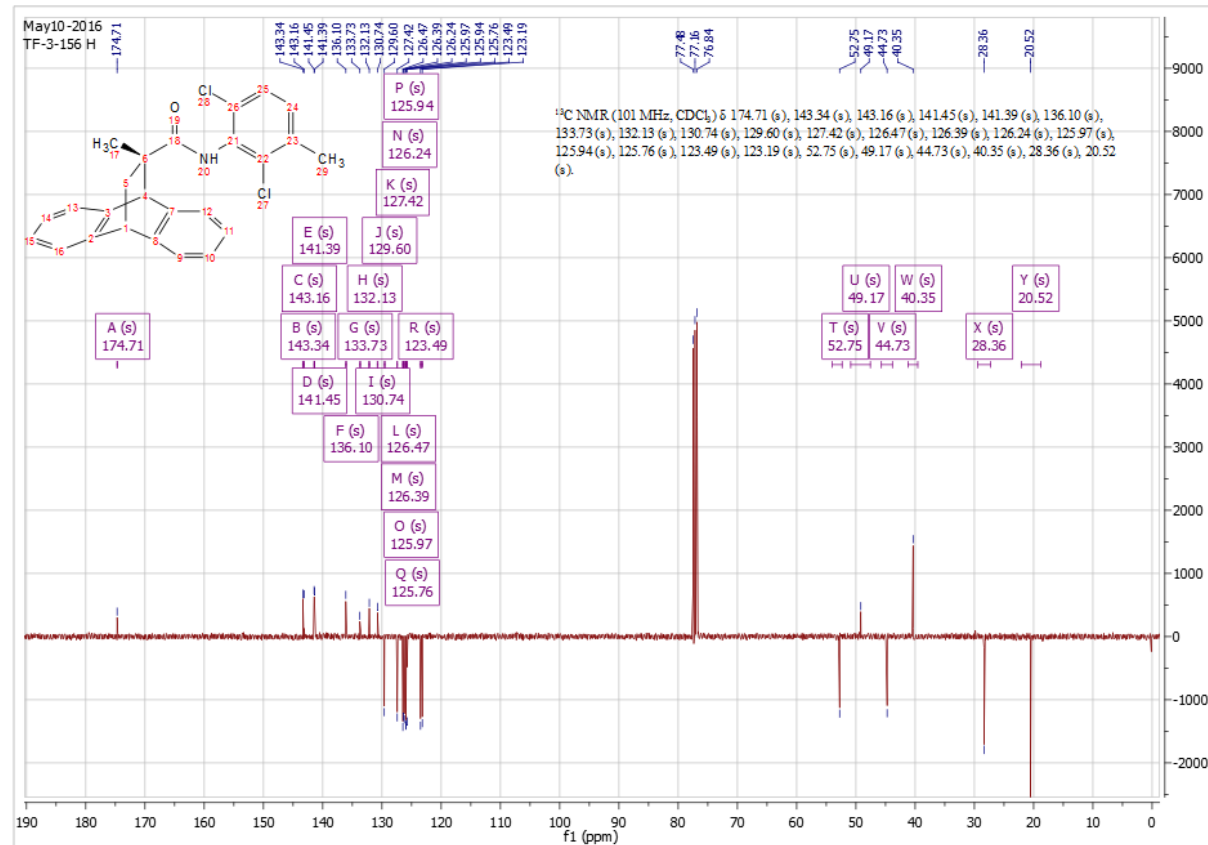

**Figure S13. Analytical HPLC trace for Compound (R)-2.**

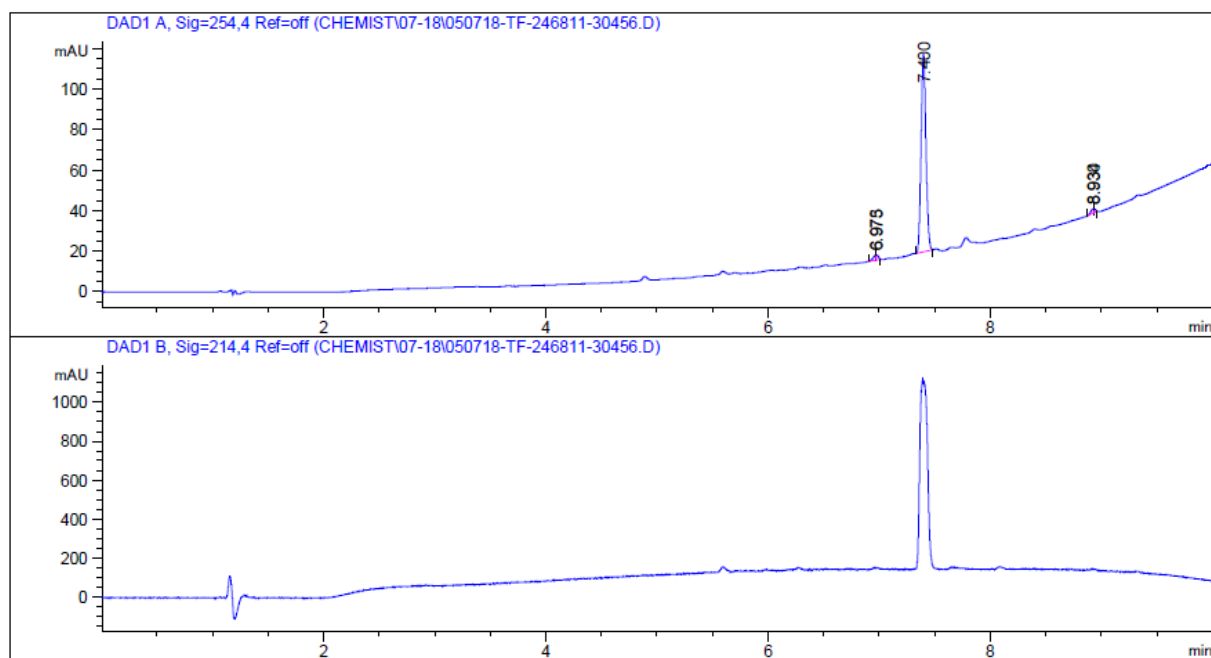

**Figure S14. Chiral HPLC trace for Compound (R)-2, obtained using 'Column B' as outlined in general information.**

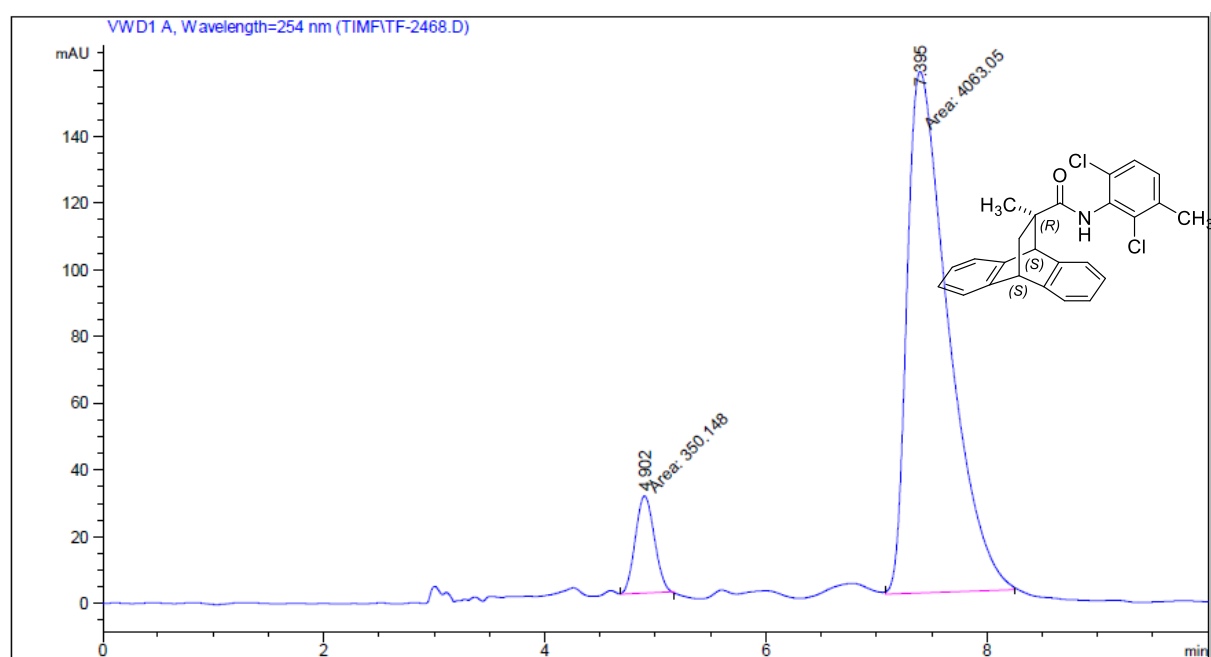

Figure S15.  $^1\text{H}$  NMR spectrum for Compound (R)-2.

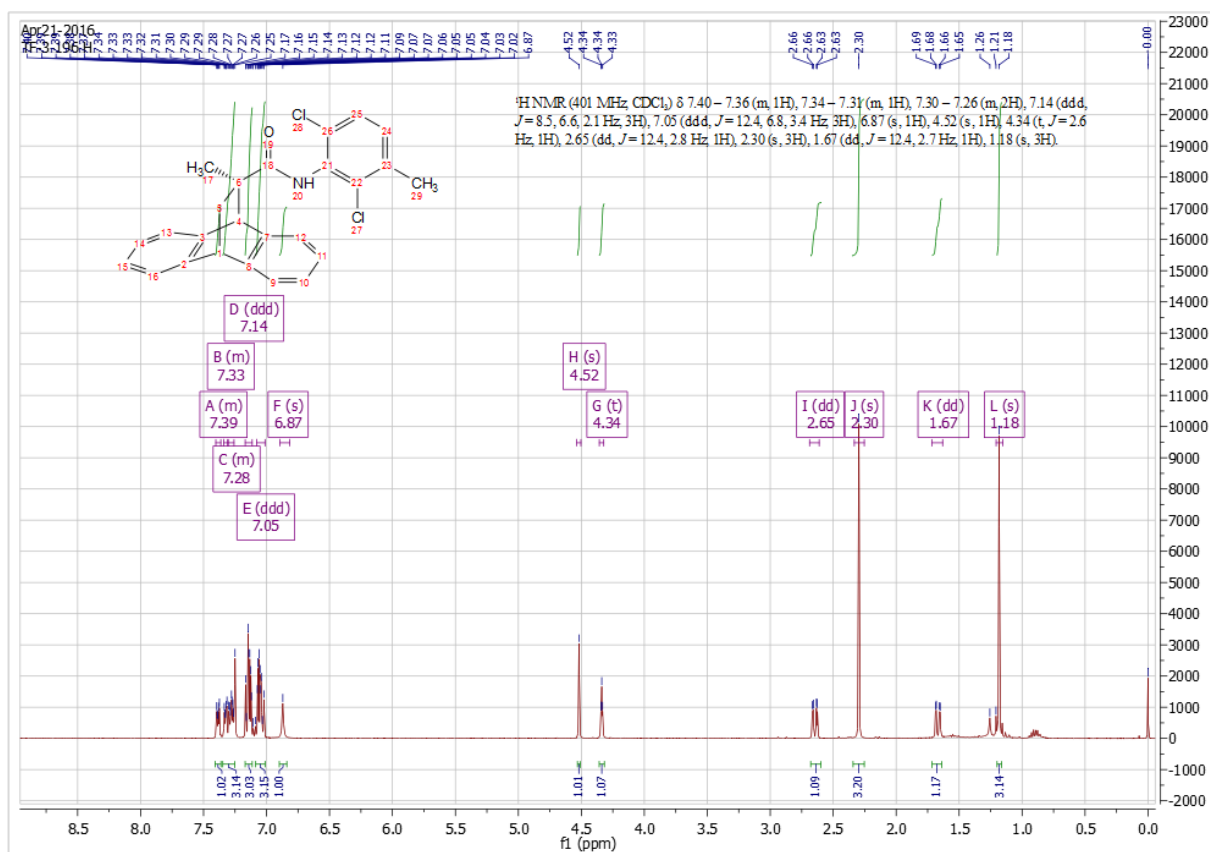

Figure S16.  $^{13}\text{C}$  NMR spectrum for Compound (R)-2.

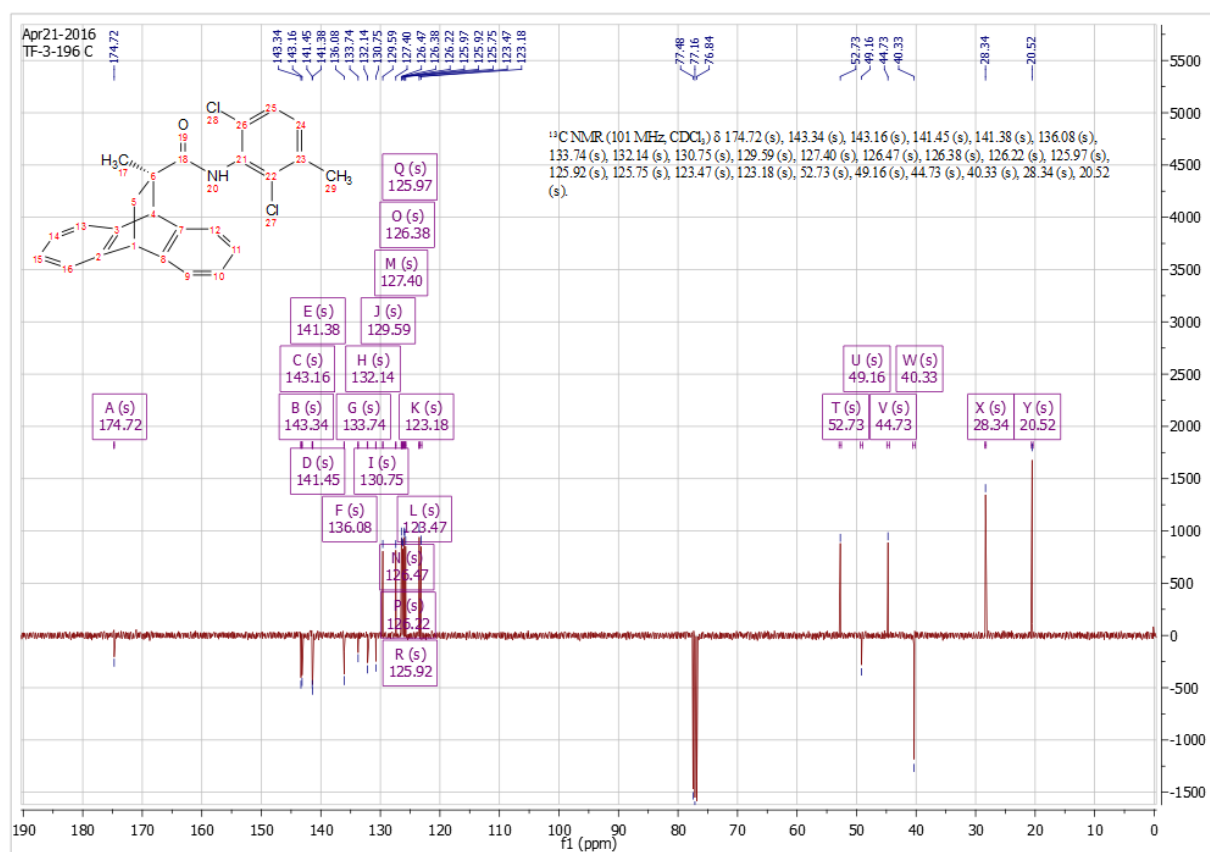

Supplement: s1 [file s1]
